# Supplementary material
Source: bioRxiv or medRxiv preprint supplement (https://www.biorxiv.org/highwire/filestream/73431/field_highwire_adjunct_files/11/180620-6.pdf)

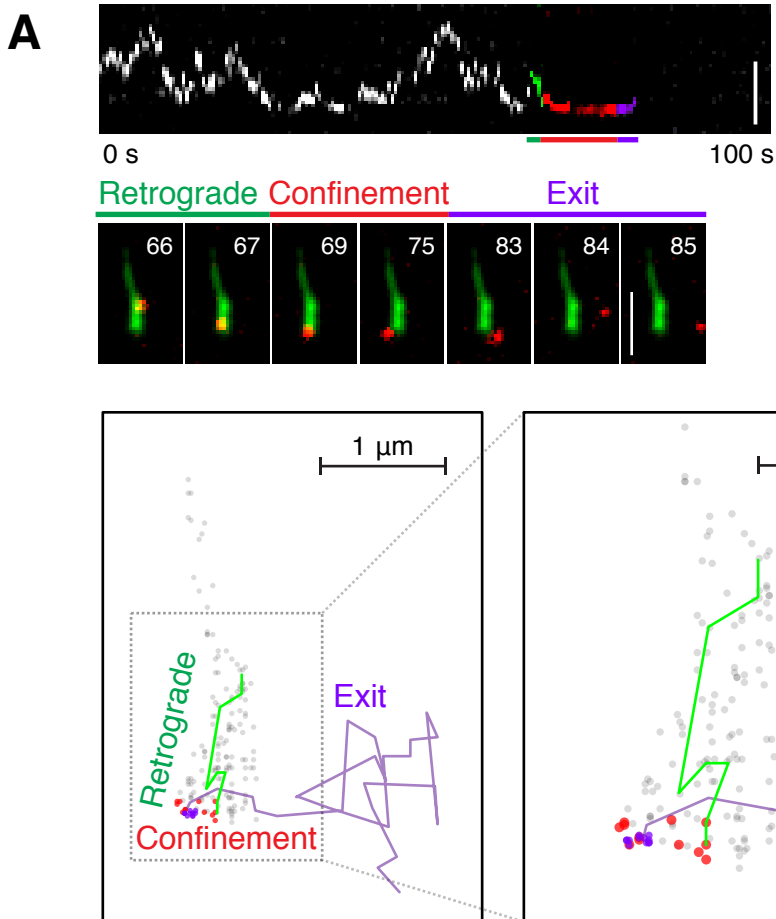

**B**

| <sup>QD</sup> GPR161 single molecule imaging data set                       | Theoretical probability of witnessing one or more exit event | Number of exit events imaged |
|-----------------------------------------------------------------------------|--------------------------------------------------------------|------------------------------|
| #1: 26 movies x 20min = 520 min                                             | 90.3%                                                        | 1                            |
| #2: 78 movies x 5min = 390 min                                              | 81.4%                                                        | 1                            |
| #3: 17 movies x 20min = 340 min<br>( NG channel captured at 1 min interval) | 78.3%                                                        | 1                            |

The theoretical probability of witnessing one or more exit event is  $P_{\text{exit}} = 1 - (1 - (R_{\text{exit}} * N_{\text{min}}))^{N_{\text{movie}}}$

where  $R_{\text{exit}}$  is the exit rate of GPR161 (0.256/h = 0.0043/min, measured in Fig. 1G),

$N_{\text{min}}$  is the length of each movie in minutes and  $N_{\text{movie}}$  is the number of movies captured.

Therefore, probability #1 =  $1 - (1 - (0.0043 * 20))^{26} = 0.90348$

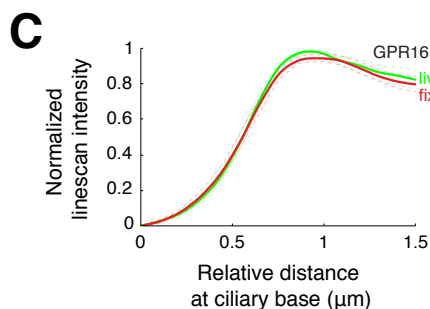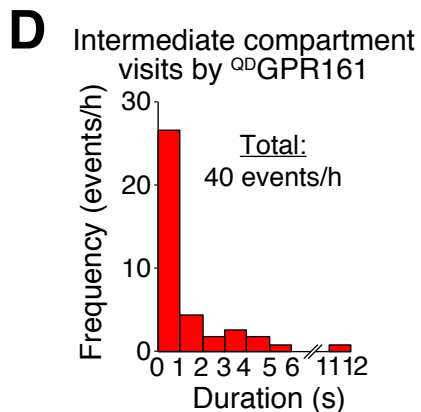

Supplement: Supplementary file [file 180620-6.pdf]
